# Supplementary material for: ATM controls DNA repair and mitochondria transfer between neighboring cells
Source: PubMed Central journal article supplement (PMC6842230; doi:10.1186/s12964-019-0472-x), 2019-11-08

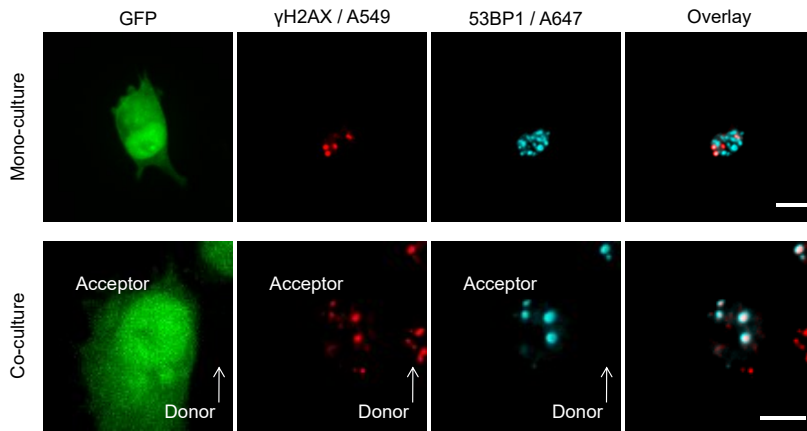

Supplement: 12964_2019_472_MOESM7_ESM.pdf [file 12964_2019_472_MOESM7_ESM.pdf]
